# Supplementary material
Source: PubMed Central journal article supplement (PMC3603501)
Supplement: Supp_Figure1.pdf [file Supp_Figure1.pdf]

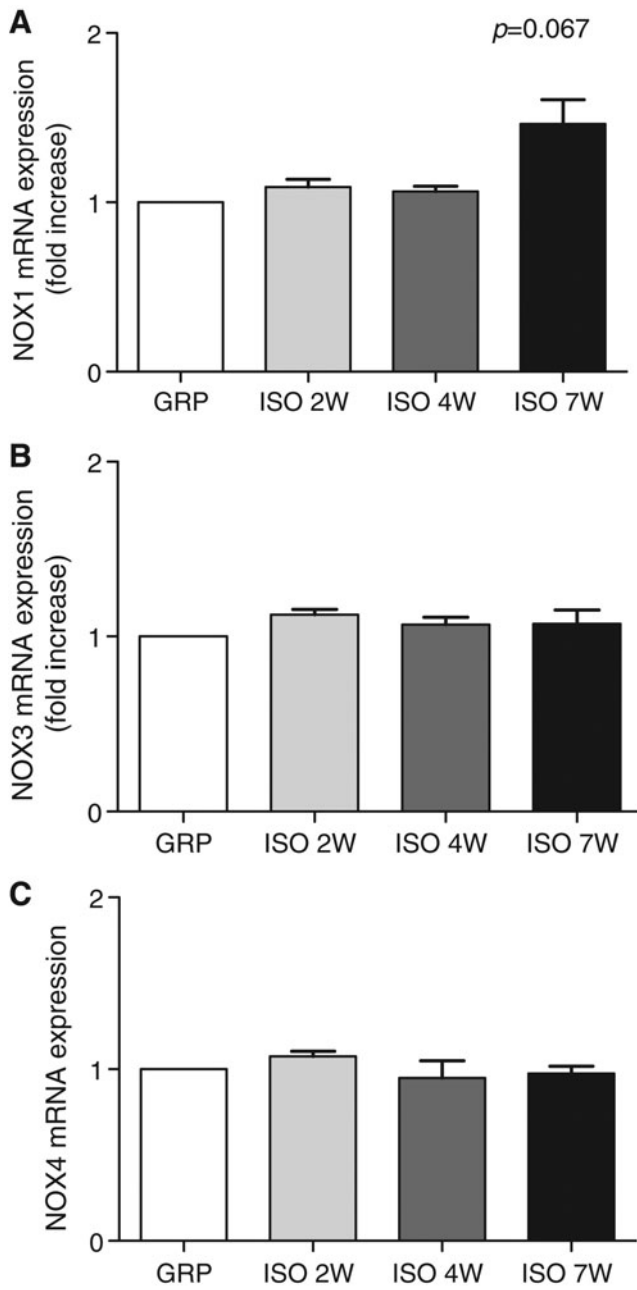

**SUPPLEMENTARY FIG. S1. NOX expression in the hypothalamus of GRP and ISO rats.** Real-time PCR for *NOX1* (A), *NOX3* (B), and *NOX4* (C) in the hypothalamus of controls (GRP) and isolated animals (ISO) for a period of 2 weeks (2W), 4 weeks (4W), and 7 weeks (7W) of social isolation. Statistical analysis: Two-way analysis of variance followed by Tukey *post hoc* test. NOX, NADPH oxidase; PCR, polymerase chain reaction.
