# Supplementary material
Source: PubMed Central journal article supplement (PMC3603501)
Supplement: Supp_Figure2.pdf [file Supp_Figure2.pdf]

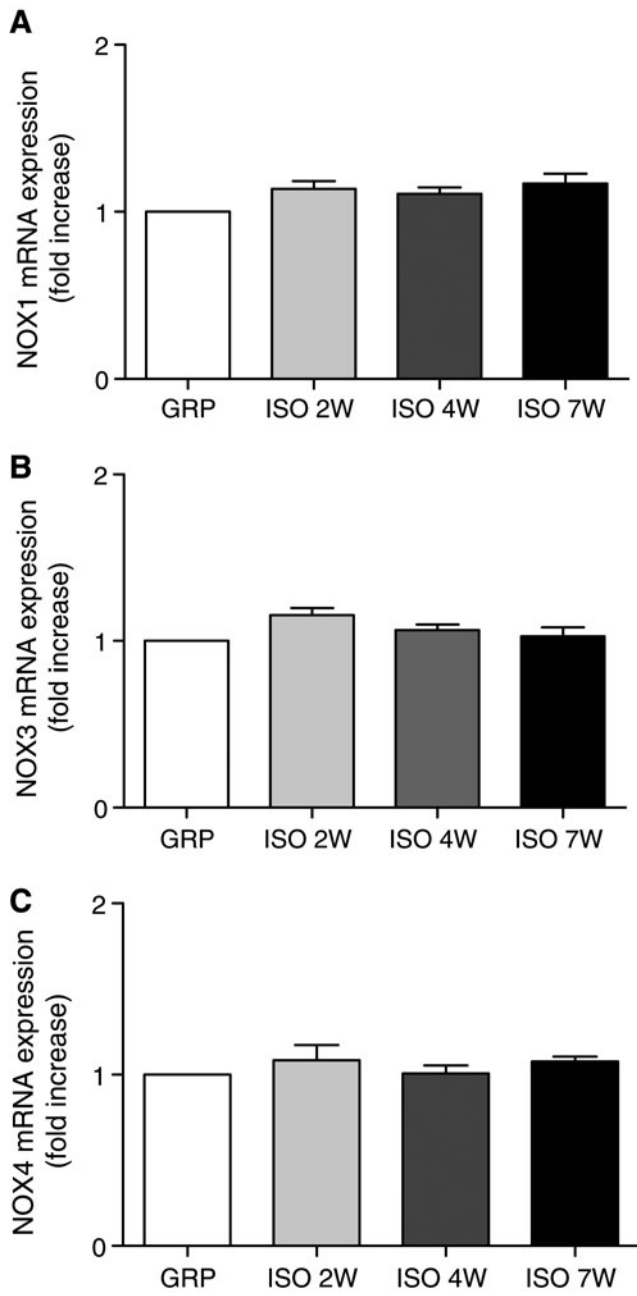

**SUPPLEMENTARY FIG. S2.** Real-time PCR for *NOX1* (A), *NOX3* (B), and *NOX4* (C) in the adrenal gland of controls (GRP) and isolated animals (ISO) for a period of 2W, 4W, and 7W of social isolation. Statistical analysis: Two-way analysis of variance followed by Tukey *post hoc* test.
