# Supplementary material
Source: PubMed Central journal article supplement (PMC3603501)
Supplement: Supp_Figure3.pdf [file Supp_Figure3.pdf]

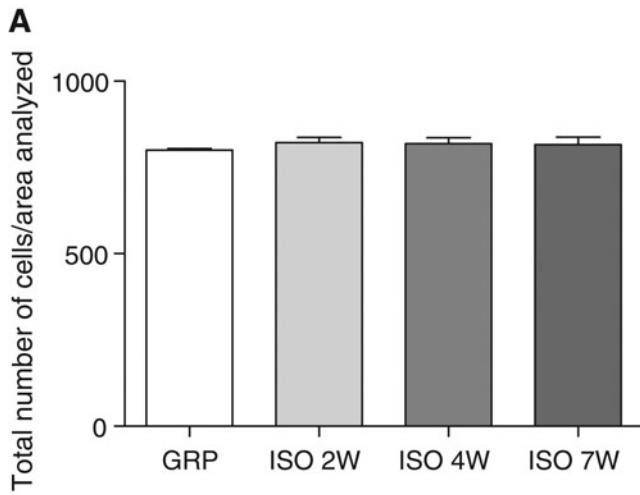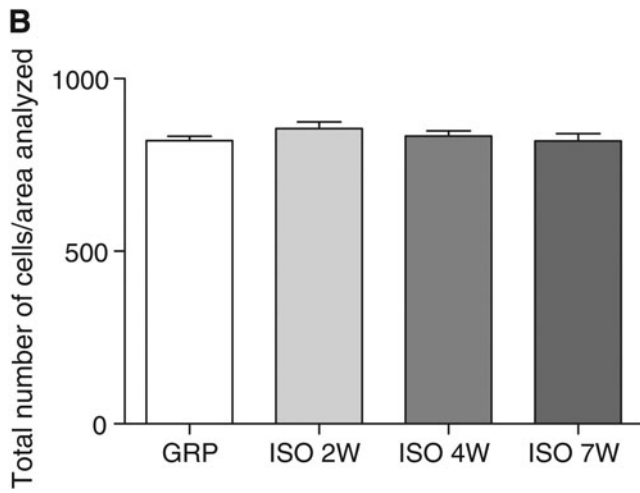

**SUPPLEMENTARY FIG. S3. Quantification of the total cell number per area in GRP and ISO for the immunostaining experiments. (A, B)** Quantification of the total cell number per area analyzed in the hypothalamus of control (GRP) and isolated animals (ISO) for a period of 2W, 4W, and 7W for 8OHdG- (A) and nitrotyrosine- (B) staining experiments.
