# Supplementary material
Source: PubMed Central journal article supplement (PMC3603501)
Supplement: Supp_Table1.pdf [file Supp_Table1.pdf]

## Supplementary Data

SUPPLEMENTARY TABLE S1. THE *Ncf1* MUTATION DOES NOT PROTECT FROM THE NEUROENDOCRINE ALTERATIONS INDUCED BY SHORT-LASTING STRESS

| <i>Marker of HPA-axis functioning</i> | <i>NCF1E3</i> | <i>NCF1DA</i> | <i>NCF1E3 Restrain</i>             | <i>NCF1DA Restrain</i>             |
|---------------------------------------|---------------|---------------|------------------------------------|------------------------------------|
| CRF (ng/ml)                           | 0.76 ± 0.13   | 0.83 ± 0.06   | 5.83 ± 0.1<br>p < 0.001 vsNCF1E3   | 5.67 ± 0.3<br>p < 0.001 vsNCF1DA   |
| Plasmatic ACTH (pg/ml)                | 13.2 ± 1.4    | 12.3 ± 2.4    | 18.9 ± 1.5<br>p < 0.001 vsNCF1E3   | 17.6 ± 1.7<br>p < 0.001 vsNCF1DA   |
| Plasmatic Corticosterone (nmol/L)     | 1.34 ± 0.32   | 1.27 ± 0.04   | 6.7 ± 0.02<br>p < 0.001 vsNCF1E3   | 7.3 ± 0.1<br>p < 0.001 vsNCF1DA    |
| Salivary corticosterone (pg/ml)       | 1564 ± 19.02  | 1502 ± 15.47  | 2289 ± 13.74<br>p < 0.001 vsNCF1E3 | 2378 ± 12.62<br>p < 0.001 vsNCF1DA |

Effects of a short-lasting stress (restraint stress) on the marker of HPA-axis of *Ncf1E3* and *NCF1DA* rats. Statistical analysis. Two-way analysis of variance followed by Tukey post hoc test.
